# Supplementary material for: Total column ozone in New Zealand and in the UK in the 1950s
Source: Copernicus journal article supplement (doi:10.5194/acp-20-14333-2020), 2020-11-25
Supplement: Supplementary file 1 [file acp-20-14333-2020-supplement.zip]

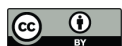

## *Supplement of*

# **Total column ozone in New Zealand and in the UK in the 1950s**

**Stefan Brönnimann and Sylvia Nichol**

*Correspondence to:* Stefan Brönnimann ([stefan.broennimann@giub.unibe.ch](mailto:stefan.broennimann@giub.unibe.ch))

- [acp-20-14333-2020-supplement-title-page.pdf](#)
- Aarhus\_1940\_1944
  - [aarhus\\_monthlymeans\\_1940\\_1944.txt](#)
  - [aarhus\\_readme.txt](#)
- Bombay\_1936-38
  - [Bombay\\_1936-38.txt](#)
  - [Bombay\\_1936-38.xls](#)
  - [Bombay\\_1936-38\\_readme.txt](#)
- Canberra\_1929-32
  - [Canberra\\_1929-32.txt](#)
  - [Canberra\\_1929-32.xls](#)
  - [Canberra\\_1929-32\\_readme.txt](#)
- College\_1952\_1957
  - [college\\_dailymeans\\_1952\\_1957.txt](#)
  - [college\\_readme.txt](#)
- Downham\_Market\_1950\_1951
  - [Downham\\_Market\\_1950\\_1951.txt](#)
  - [Downham\\_Market\\_1950\\_1951\\_readme.txt](#)
- Edmonton\_1950-52
  - [Edmonton\\_1950-52.txt](#)
  - [Edmonton\\_1950-52\\_readme.txt](#)
  - [Edmonton\\_1950\\_1952.xls](#)

- Flagstaff\_1954-57
  - Flagstaff\_1954-57.txt
  - Flagstaff\_1954-57.xls
  - Flagstaff\_1954-57\_readme.txt
- India\_1955-58
  - India\_1955-58.txt
  - India\_1955-58.xls
  - India\_1955-58\_readme.txt
- Kelburn\_Ozone\_DailyMeans.xlsx
- Tateno\_1955-57
  - Tateno\_1955-1957.xls
  - Tateno\_1955-56.txt
  - Tateno\_1955-56\_readme.txt
  - Tateno\_1957.txt
  - Tateno\_1957\_readme.txt
- Various\_Europe\_1924-29
  - 1924-1929\_ohne\_Oxford.xls
  - Various\_1926-29\_daily.txt
  - Various\_1926-29\_monthly.txt
  - Various\_1926-29\_readme.txt
- Wellington\_1951\_1959
  - Wellington\_ReducedOzone.txt
- Zikawei\_1932\_1936
  - zikawei\_dailymeans\_1932\_1936.txt
  - zikawei\_readme.txt

The copyright of individual parts of the supplement might differ from the CC BY 4.0 License.
